# Supplementary material for: Barriers to healthcare for autistic adults: Consequences & policy implications. A cross-sectional study
Source: bioRxiv or medRxiv preprint supplement (doi:10.1101/2020.04.01.20050336), 2020-11-27
Supplement: Supplementary file [file media-1.zip]

## Supplementary Tables

Table S1: Predictability & Control

| <b>Difficulty not knowing:</b>           | <b>Autistic</b> | <b>Parents</b> | <b>Control</b> | <b>Autistic.Control</b> | <b>Autistic.Parent</b> | <b>Parent.Control</b> |
|------------------------------------------|-----------------|----------------|----------------|-------------------------|------------------------|-----------------------|
| Which doctor you will see                | 292 (57.6%)     | 54 (27.6%)     | 38 (24.2%)     | p<0.001 **              | p<0.001 **             | p=0.555 ns            |
| How long you will wait                   | 355 (70.0%)     | 96 (49.0%)     | 47 (29.9%)     | p<0.001 **              | p<0.001 **             | p<0.001 **            |
| How long the consultation will last      | 201 (39.6%)     | 27 (13.8%)     | 12 (7.6%)      | p<0.001 **              | p<0.001 **             | p=0.098 ns            |
| What will happen during the consultation | 320 (63.1%)     | 33 (16.8%)     | 25 (15.9%)     | p<0.001 **              | p<0.001 **             | p=0.932 ns            |
| None of the above                        | 36 (7.1%)       | 64 (32.7%)     | 84 (53.5%)     | p<0.001 **              | p<0.001 **             | p<0.001 **            |

Table S2: Judgements & Attitudes

| <b>Going to the doctor, I am anxious :</b>                                          | <b>Autistic</b> | <b>Parents</b> | <b>Control</b> | <b>Autistic.Control</b> | <b>Autistic.Parent</b> | <b>Parent.Control</b> |
|-------------------------------------------------------------------------------------|-----------------|----------------|----------------|-------------------------|------------------------|-----------------------|
| I won't be taken seriously when I describe my symptoms                              | 341 (67.3%)     | 51 (26.0%)     | 54 (34.4%)     | p<0.001 **              | p<0.001 **             | p=0.111 ns            |
| I might be wasting the doctor's time                                                | 333 (65.7%)     | 71 (36.2%)     | 53 (33.8%)     | p<0.001 **              | p<0.001 **             | p=0.711 ns            |
| I might be considered a hypochondriac                                               | 330 (65.1%)     | 43 (21.9%)     | 42 (26.8%)     | p<0.001 **              | p<0.001 **             | p=0.355 ns            |
| about asking for help                                                               | 318 (62.7%)     | 41 (20.9%)     | 28 (17.8%)     | p<0.001 **              | p<0.001 **             | p=0.554 ns            |
| about discussing mental health                                                      | 301 (59.4%)     | 57 (29.1%)     | 37 (23.6%)     | p<0.001 **              | p<0.001 **             | p=0.297 ns            |
| that there might be something wrong                                                 | 217 (42.8%)     | 41 (20.9%)     | 55 (35.0%)     | p=0.102 ns              | p<0.001 **             | p=0.004 **            |
| I don't feel anxious going to the doctor                                            | 17 (3.4%)       | 56 (28.6%)     | 52 (33.1%)     | p<0.001 **              | p<0.001 **             | p=0.420 ns            |
| <b>Is stimming a problem for you at the doctors' office?</b>                        | <b>Autistic</b> | <b>Parents</b> | <b>Control</b> | <b>Autistic.Control</b> | <b>Autistic.Parent</b> | <b>Parent.Control</b> |
| Unusual behaviours or stimming elicit negative reactions from other patients        | 74 (14.6%)      | 69 (35.2%)     | 4 (2.5%)       | p<0.001 **              | p<0.001 **             | p<0.001 **            |
| Unusual behaviours or stimming elicit negative reactions from other reception staff | 44 (8.7%)       | 26 (13.3%)     | 1 (0.6%)       | p=0.001 **              | p=0.093 ns             | p<0.001 **            |
| Unusual behaviours or stimming elicit negative reactions from other medical staff   | 37 (7.3%)       | 18 (9.2%)      | 2 (1.3%)       | p=0.009 **              | p=0.498 ns             | p=0.003 **            |
| I feel comfortable with stimming at the doctors' office                             | 101 (19.9%)     | 69 (35.2%)     | 74 (47.1%)     | p<0.001 **              | p<0.001 **             | p=0.031 *             |
| I do not feel comfortable with stimming at the doctors' office                      | 4 (0.8%)        | 38 (19.4%)     | 5 (3.2%)       | p=0.061 ns              | p<0.001 **             | p<0.001 **            |
| No need to stim at the doctors' office                                              | 133 (26.2%)     | 0 (0.0%)       | 0 (0.0%)       | p<0.001 **              | p<0.001 **             |                       |
| I don't understand the term "stimming"                                              | 29 (5.7%)       | 11 (5.6%)      | 62 (39.5%)     | p<0.001 **              | p=1.000 ns             | p<0.001 **            |

Table S3: Planning & Organising

| Planning & organising                                                 | Autistic    | Parents    | Control    | Autistic.Control | Autistic.Parent | Parent.Control |
|-----------------------------------------------------------------------|-------------|------------|------------|------------------|-----------------|----------------|
| I find it difficult to prioritise when describing my medical problems | 333 (65.7%) | 38 (19.4%) | 34 (21.7%) | p<0.001 **       | p<0.001 **      | p=0.695 ns     |
| I need to give the whole story and not leave anything out             | 332 (65.5%) | 30 (15.3%) | 18 (11.5%) | p<0.001 **       | p<0.001 **      | p=0.373 ns     |
| I find it difficult to make appointments in advance                   | 300 (59.2%) | 71 (36.2%) | 45 (28.7%) | p<0.001 **       | p<0.001 **      | p=0.165 ns     |
| Making changes to my lifestyle or habits is difficult for me          | 282 (55.6%) | 50 (25.5%) | 36 (22.9%) | p<0.001 **       | p<0.001 **      | p=0.663 ns     |
| I have forgotten to attend a medical appointment                      | 230 (45.4%) | 54 (27.6%) | 34 (21.7%) | p<0.001 **       | p<0.001 **      | p=0.251 ns     |
| I need to write things down                                           | 227 (44.8%) | 19 (9.7%)  | 17 (10.8%) | p<0.001 **       | p<0.001 **      | p=0.863 ns     |
| I find waiting difficult                                              | 221 (43.6%) | 26 (13.3%) | 15 (9.6%)  | p<0.001 **       | p<0.001 **      | p=0.361 ns     |
| I have difficulty making decisions about my health                    | 222 (43.8%) | 18 (9.2%)  | 20 (12.7%) | p<0.001 **       | p<0.001 **      | p=0.369 ns     |
| I have turned up for a medical appointment on the wrong day           | 151 (29.8%) | 27 (13.8%) | 16 (10.2%) | p<0.001 **       | p<0.001 **      | p=0.390 ns     |
| It is difficult to arrange someone to come with me                    | 103 (20.3%) | 6 (3.1%)   | 2 (1.3%)   | p<0.001 **       | p<0.001 **      | p=0.446 ns     |
| I have forgotten why I made the appointment                           | 54 (10.7%)  | 4 (2.0%)   | 1 (0.6%)   | p<0.001 **       | p<0.001 **      | p=0.512 ns     |
| None of the above                                                     | 13 (2.6%)   | 53 (27.0%) | 64 (40.8%) | p<0.001 **       | p<0.001 **      | p=0.009 **     |

Table S4: Support needs

| Do you visit your doctor:                                               | Autistic    | Parents     | Control     | Autistic.Control | Autistic.Parent | Parent.Control |
|-------------------------------------------------------------------------|-------------|-------------|-------------|------------------|-----------------|----------------|
| Alone, by choice                                                        | 306 (60.4%) | 105 (53.6%) | 134 (85.4%) | p<0.001 **       | p=0.121 ns      | p<0.001 **     |
| Alone, but would prefer to have a support person                        | 165 (32.5%) | 3 (1.5%)    | 10 (6.4%)   | p<0.001 **       | p<0.001 **      | p=0.034 *      |
| With a parent, partner or support person                                | 137 (27.0%) | 15 (7.7%)   | 9 (5.7%)    | p<0.001 **       | p<0.001 **      | p=0.617 ns     |
| With a parent, partner or support person but I would prefer to go alone | 12 (2.4%)   | 0 (0.0%)    | 0 (0.0%)    | p=0.109 ns       | p=0.065 ns      |                |
| With a support animal                                                   | 5 (1.0%)    | 1 (0.5%)    | 0 (0.0%)    | p=0.471 ns       | p=0.874 ns      | p=1.000 ns     |
| To support an autistic adult                                            | 26 (5.1%)   | 29 (14.8%)  | 0 (0.0%)    | p=0.008 **       | p<0.001 **      | p<0.001 **     |
| As a parent to access healthcare for my child                           | 78 (15.4%)  | 115 (58.7%) | 30 (19.1%)  | p=0.327 ns       | p<0.001 **      | p<0.001 **     |
| With my child, but I would prefer to go alone                           | 6 (1.2%)    | 61 (31.1%)  | 12 (7.6%)   | p<0.001 **       | p<0.001 **      | p<0.001 **     |

**If you were suddenly admitted to hospital, who would be able to bring your personal belongings to you?**

|                                   | <b>Autistic</b> | <b>Parents</b> | <b>Control</b> | <b>Autistic.Control</b> | <b>Autistic.Parent</b> | <b>Parent.Control</b> |
|-----------------------------------|-----------------|----------------|----------------|-------------------------|------------------------|-----------------------|
| Spouse or partner                 | 234 (46.2%)     | 137 (69.9%)    | 106 (67.5%)    | p<0.001 **              | p<0.001 **             | p=0.715 ns            |
| Parent                            | 168 (33.1%)     | 76 (38.8%)     | 70 (44.6%)     | p=0.012 *               | p=0.187 ns             | p=0.321 ns            |
| Other family member               | 96 (18.9%)      | 57 (29.1%)     | 72 (45.9%)     | p<0.001 **              | p=0.005 **             | p=0.002 **            |
| Friend                            | 118 (23.3%)     | 41 (20.9%)     | 57 (36.3%)     | p=0.002 **              | p=0.569 ns             | p=0.002 **            |
| Neighbour                         | 17 (3.4%)       | 6 (3.1%)       | 14 (8.9%)      | p=0.008 **              | p=1.000 ns             | p=0.033 *             |
| Paid support person or carer      | 15 (3.0%)       | 7 (3.6%)       | 1 (0.6%)       | p=0.174 ns              | p=0.860 ns             | p=0.139 ns            |
| Volunteer support person or carer | 6 (1.2%)        | 0 (0.0%)       | 0 (0.0%)       | p=0.375 ns              | p=0.284 ns             |                       |
| Nobody available                  | 88 (17.4%)      | 13 (6.6%)      | 5 (3.2%)       | p<0.001 **              | p<0.001 **             | p=0.222 ns            |

**If you were admitted to hospital for a day case surgical procedure, who would be available to collect you afterwards?**

|                                   | <b>Autistic</b> | <b>Parents</b> | <b>Control</b> | <b>Autistic.Control</b> | <b>Autistic.Parent</b> | <b>Parent.Control</b> |
|-----------------------------------|-----------------|----------------|----------------|-------------------------|------------------------|-----------------------|
| Spouse or partner                 | 208 (41.0%)     | 135 (68.9%)    | 100 (63.7%)    | p<0.001 **              | p<0.001 **             | p=0.362 ns            |
| Parent                            | 176 (34.7%)     | 78 (39.8%)     | 73 (46.5%)     | p=0.010 *               | p=0.242 ns             | p=0.248 ns            |
| Other family member               | 96 (18.9%)      | 60 (30.6%)     | 75 (47.8%)     | p<0.001 **              | p=0.001 **             | p=0.001 **            |
| Friend                            | 116 (22.9%)     | 46 (23.5%)     | 67 (42.7%)     | p<0.001 **              | p=0.947 ns             | p<0.001 **            |
| Neighbour                         | 17 (3.4%)       | 4 (2.0%)       | 8 (5.1%)       | p=0.446 ns              | p=0.503 ns             | p=0.201 ns            |
| Paid support person or carer      | 17 (3.4%)       | 9 (4.6%)       | 0 (0.0%)       | p=0.042 *               | p=0.577 ns             | p=0.017 *             |
| Volunteer support person or carer | 3 (0.6%)        | 0 (0.0%)       | 0 (0.0%)       | p=0.776 ns              | p=0.664 ns             |                       |
| Nobody available                  | 99 (19.5%)      | 14 (7.1%)      | 3 (1.9%)       | p<0.001 **              | p<0.001 **             | p=0.042 *             |

**If you needed assistance at home after an operation, who would be available to provide that care?**

|                     | <b>Autistic</b> | <b>Parents</b> | <b>Control</b> | <b>Autistic.Control</b> | <b>Autistic.Parent</b> | <b>Parent.Control</b> |
|---------------------|-----------------|----------------|----------------|-------------------------|------------------------|-----------------------|
| Spouse or partner   | 219 (43.2%)     | 123 (62.8%)    | 101 (64.3%)    | p<0.001 **              | p<0.001 **             | p=0.846 ns            |
| Parent              | 152 (30.0%)     | 71 (36.2%)     | 74 (47.1%)     | p<0.001 **              | p=0.132 ns             | p=0.050 *             |
| Other family member | 83 (16.4%)      | 50 (25.5%)     | 61 (38.9%)     | p<0.001 **              | p=0.008 **             | p=0.010 *             |
| Friend              | 74 (14.6%)      | 31 (15.8%)     | 43 (27.4%)     | p<0.001 **              | p=0.772 ns             | (p=0.012 *            |

|                                   |             |            |           |            |            |            |
|-----------------------------------|-------------|------------|-----------|------------|------------|------------|
| Neighbour                         | 14 (2.8%)   | 7 (3.6%)   | 8 (5.1%)  | p=0.241 ns | p=0.750 ns | p=0.660 ns |
| Paid support person or carer      | 30 (5.9%)   | 11 (5.6%)  | 3 (1.9%)  | p=0.071 ns | p=1.000 ns | p=0.135 ns |
| Volunteer support person or carer | 4 (0.8%)    | 0 (0.0%)   | 0 (0.0%)  | p=0.599 ns | p=0.491 ns |            |
| Nobody available                  | 131 (25.8%) | 34 (17.3%) | 13 (8.3%) | p<0.001 ** | p=0.022 *  | p=0.020 *  |

**If you are a parent and you were unable to care for your child due to illness, who would be available to provide that care to your child?**

|                                     | <b>Autistic</b> | <b>Parents</b> | <b>Control</b> | <b>Autistic.Control</b> | <b>Autistic.Parent</b> | <b>Parent.Control</b> |
|-------------------------------------|-----------------|----------------|----------------|-------------------------|------------------------|-----------------------|
| Spouse or partner                   | 110 (21.7%)     | 135 (68.9%)    | 64 (40.8%)     | p<0.001 **              | p<0.001 **             | p<0.001 **            |
| Parent                              | 37 (7.3%)       | 63 (32.1%)     | 40 (25.5%)     | p<0.001 **              | p<0.001 **             | p=0.211 ns            |
| Other family member                 | 40 (7.9%)       | 52 (26.5%)     | 40 (25.5%)     | p<0.001 **              | p<0.001 **             | p=0.919 ns            |
| Friend                              | 21 (4.1%)       | 24 (12.2%)     | 27 (17.2%)     | p<0.001 **              | p<0.001 **             | p=0.245 ns            |
| Neighbour                           | 4 (0.8%)        | 8 (4.1%)       | 8 (5.1%)       | p<0.001 **              | p=0.007 **             | p=0.843 ns            |
| Paid support person or carer        | 5 (1.0%)        | 20 (10.2%)     | 9 (5.7%)       | p<0.001 **              | p<0.001 **             | p=0.185 ns            |
| Volunteer support person or carer   | 1 (0.2%)        | 1 (0.5%)       | 0 (0.0%)       | p=1.000 ns              | p=1.000 ns             | p=1.000 ns            |
| Nobody available                    | 34 (6.7%)       | 27 (13.8%)     | 6 (3.8%)       | p=0.256 ns              | p=0.005 **             | p=0.003 **            |
| I don't have a child requiring care | 274 (54.0%)     | 1 (0.5%)       | 78 (49.7%)     | p=0.387 ns              | p<0.001 **             | p<0.001 **            |

**Table S5: Facilitators**

| <b>Visits to my doctor would be easier if:</b>                                       | <b>Autistic</b> | <b>Parents</b> | <b>Control</b> | <b>Autistic.Control</b> | <b>Autistic.Parent</b> | <b>Parent.Control</b> |
|--------------------------------------------------------------------------------------|-----------------|----------------|----------------|-------------------------|------------------------|-----------------------|
| I could book an appointment online                                                   | 339 (66.9%)     | 113 (57.7%)    | 102 (65.0%)    | p=0.732 ns              | p=0.028 *              | p=0.197 ns            |
| I could email my doctor in advance with a description of the issue I need to discuss | 316 (62.3%)     | 51 (26.0%)     | 35 (22.3%)     | p<0.001 **              | p<0.001 **             | p=0.493 ns            |
| I could wait in a quiet place or outside until it was my turn                        | 284 (56.0%)     | 45 (23.0%)     | 13 (8.3%)      | p<0.001 **              | p<0.001 **             | p<0.001 **            |
| I could book the first or last appointment of the day                                | 210 (41.4%)     | 79 (40.3%)     | 38 (24.2%)     | p<0.001 **              | p=0.854 ns             | p=0.002 **            |
| I could book an appointment by text                                                  | 209 (41.2%)     | 54 (27.6%)     | 44 (28.0%)     | p=0.004 **              | p=0.001 **             | p=1.000 ns            |
| There was a sensory box available in the waiting room                                | 80 (15.8%)      | 28 (14.3%)     | 4 (2.5%)       | p<0.001 **              | p=0.707 ns             | p<0.001 **            |
| None of the above                                                                    | 16 (3.2%)       | 32 (16.3%)     | 34 (21.7%)     | p<0.001 **              | p<0.001 **             | p=0.255 ns            |
